# Supplementary material for: Impact of Tuning the Surface Charge Distribution on Colloidal Iron Oxide Nanoparticle Toxicity Investigated in Caenorhabditis elegans
Source: MDPI journal article supplement (doi:10.3390/nano11061551), 2021-06-11
Supplement: s1 [file s1]

# Impact of Tuning the Surface Charge Distribution on Colloidal Iron Oxide Nanoparticle Toxicity Investigated in *Caenorhabditis elegans*

Loredana Amigoni †, Lucia Salvioni †, Barbara Sciandrone, Marco Giustra, Chiara Pacini, Paolo Tortora, Davide Prosperi, Miriam Colombo \* and Maria Elena Regonesi \*

Department of Biotechnologies and Biosciences, University of Milano-Bicocca, 20126 Milan, Italy;  
loredana.amigoni1@unimib.it (L.A.); lucia.salvioni@unimib.it (L.S.); barbara.sciandrone@unimib.it (B.S.);  
m.giustra2@campus.unimib.it (M.G.); chiara.pacini1991@gmail.com (C.P.); paolo.tortora@unimib.it (P.T.);  
davide.prosperi@unimib.it (D.P.)

\* Correspondence: miriam.colombo@unimib.it (M.C.); mariaelena.regonesi@unimib.it (M.E.R.);  
Tel.: +39-02-6448-3388 (M.C.); +39-02-6448-3437 (M.E.R.)

† These authors contributed equally to this work.

**Table S1.** NPs stability - DLS analyses of MYTS, MYTS-EDBE, MYTS-PEG after 25 days. The hydrodynamic diameter was obtained by number size distribution. Data represent mean  $\pm$  SD of three independent measurements.

|           | Hydrodynamic diameter (nm) | Polydispersity Index (PDI) |
|-----------|----------------------------|----------------------------|
| MYTS      | 32.4 $\pm$ 7.2             | 0.204 $\pm$ 0.013          |
| MYTS-PEG  | 29.5 $\pm$ 0.5             | 0.259 $\pm$ 0.022          |
| MYTS-EDBE | 40.6 $\pm$ 7.3             | 0.228 $\pm$ 0.006          |

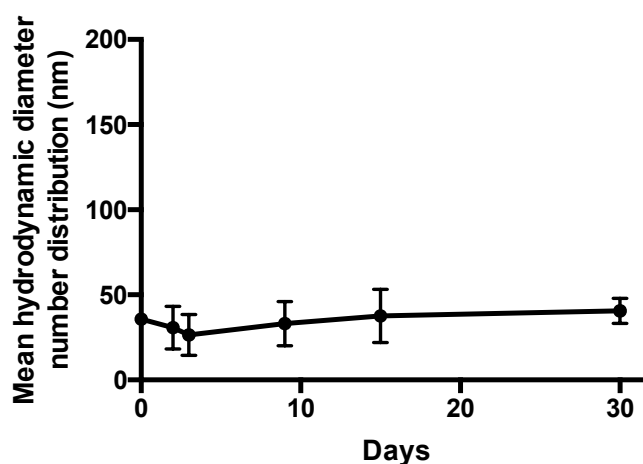

**Figure S1.** Stability over time of a representative batch of PMDA-coated iron oxide NPs (MYTS-EDBE). The hydrodynamic diameter was obtained by number size distribution. Data represent mean  $\pm$  SD of three independent measurements.
